# Supplementary material for: Associations of sympathetic and parasympathetic activity in job stress and burnout: A systematic review
Source: PLoS One. 2018 Oct 18;13(10):e0205741. doi: 10.1371/journal.pone.0205741 (PMC6193670; doi:10.1371/journal.pone.0205741)
Supplement: S2 Appendix — (XLSX) [file pone.0205741.s002.xlsx]

## Sheet: Table 1
De Looff et al., (2018) Autonomic nervous system activity in job stress and burnout.
Appendix B Association between HR/SDNN/HF/RMSSD/PNN50 and JS/burnout by recording period.
HR
Period	#Positive associations	#Significant effects	#Negative associations	#Significant effects	#No effect/Mixed
Rest	8	5	1	0	2
Workday	5	3	0		1
Leisure Time	1	1	1	0	0
Nighttime	3	1	2	0	1
Work-Leisure-Night	3	1	0		1
Task	1	0	2	1	0
Total	21	11	6	1	5
SDNN
Rest	0		3	2	0
Workday	1	0	3	0	1
Leisure Time	0		0		0
Nighttime	1	1	2	0	0
Work-Leisure-Night	2	0	4	1	0
Task	0		0		0
Total	4	1	12	3	1
HF
Rest	5	1	6	3	0
Workday	0		5	1	1
Leisure Time	0		3	1	0
Nighttime	1	1	3	0	1
Work-Leisure-Night	1	0	4	2	0
Task	3	0	0
Total	10	2	21	7	2
RMSSD
Rest	1	0	2	2	0
Workday	0		4	0/1	2
Leisure Time	0		1	0	2
Nighttime	1	1	3	1	4
Work-Leisure-Night	1	0	4	1	2
Task	0		0		0
Total	3	1	14	5	10
PNN50
Rest	1	0	1	1	0
Workday	1	0	0		0
Leisure Time	0		1	0	0
Nighttime	0		0		0
Work-Leisure-Night	0		2	0	0
Task	0		0		0
Total	2	0	4	1	0
Example: HR_Workday has 5 positive associations of which 3 are significant. There were 0 negative associations reported and therefore there were no significant effects. 1 association was mixed or had no effect.
