# Supplementary material for: Associations of sympathetic and parasympathetic activity in job stress and burnout: A systematic review
Source: PLoS One. 2018 Oct 18;13(10):e0205741. doi: 10.1371/journal.pone.0205741 (PMC6193670; doi:10.1371/journal.pone.0205741)
Supplement: S6 Appendix — (XLSX) [file pone.0205741.s006.xlsx]

## Sheet: RiskofBias
Appendix F
Cohort		1.Repre	2.Select	3.Ascer	4.Demon	1.Compare		1.Asses	2.Follow-up	3.Adequacy				1.Repre	2.Select	3.Ascer	4.Demon	1.Compare		1.Asses	2.Follow-up	3.Adequacy
Bishop (2003)		c	c	c	a	a hypertension		a	a	c 72.2%		Bishop (2003)	4	0	0	0	1	1	0	1	1	0
Butterbaugh (2003)		c	c	c	a			d	a	d		Butterbaugh (2003)	2	0	0	0	1	0	0	0	1	0
Borchini (2015)		c	a	c	a	a hypertension	b	a	a	a		Borchini (2015)	7	0	1	0	1	1	1	1	1	1
Chandola (2008)		b job related stress	a	c	a	a diabetes	b	d	a	a	Whitehall2	Chandola (2008)	6	0	1	0	1	1	1	0	1	1
Clays (2011)		c	a	c	a	a diabetes	b	a	a	b 20%	Belgian Physical Fitness	Clays (2011)	7	0	1	0	1	1	1	1	1	1
Collins (2005)		c	a	c	a	a serious medical conditions that affect HRV	b	a	a	b 5%	Seasons study	Collins (2005)	7	0	1	0	1	1	1	1	1	1
Ekstedt (2004)		c	a	c	a	a CVD	b	a	a	a		Ekstedt (2004)	7	0	1	0	1	1	1	1	1	1
Eller (2011)		c	a	c	a	a age	b	a	a	b 2%		Eller (2011)	7	0	1	0	1	1	1	1	1	1
Fauvel (2001)		c	a	c	a	a hypertension	b	a	a	b 3%		Fauvel (2001)	7	0	1	0	1	1	1	1	1	1
Hamer (2006)		c	a	c	a	a inflammatory factors		a	a	a		Hamer (2006)	6	0	1	0	1	1	0	1	1	1
Henning (2014)		c	a	c	a			a	a	b 17% (3 at different timepoints)		Henning (2014)	5	0	1	0	1	0	0	1	1	1
Hernandez-Gaytan (2013)		c	a	c	a	a CVD	b mediaction	a	a	a		Hernandez-Gaytan (2013)	7	0	1	0	1	1	1	1	1	1
Hintsanen (2007)		c	a	c	a	a	b	a	a	b	Young Finns study	Hintsanen (2007)	7	0	1	0	1	1	1	1	1	1
Jonsson (2015)		c	b	c	a	a hypertension	b age	a	a	b 15%		Jonsson (2015)	6	0	0	0	1	1	1	1	1	1
Kang (2004)		c	a	c	a	a METS		a	a	a		Kang (2004)	6	0	1	0	1	1	0	1	1	1
Karhula (2014)		c	a	c	a	a BMI	b shiftwork	a	a	b 4,2%		Karhula (2014)	7	0	1	0	1	1	1	1	1	1
Kotov (2012)		c	a	c	a			a	a	a		Kotov (2012)	5	0	1	0	1	0	0	1	1	1
Lee (2010)		c	a	c	a	a Age	b years of employment	a	a	a		Lee (2010)	7	0	1	0	1	1	1	1	1	1
Loerbroks (2010)		c	a	c	a	a Age	b gender, sleep etc.	a	a	b 10%	Airplane manufacturer	Loerbroks (2010)	7	0	1	0	1	1	1	1	1	1
Morgan (2002)		c	a	c	a			a	a	d		Morgan (2002)	4	0	1	0	1	0	0	1	1	0
Moya-Albiol (2010)		c	a	c	a	a exercise	b smoking	a	a	b 20%	20 % is based on a sample before exclusion	Moya-Albiol (2010)	7	0	1	0	1	1	1	1	1	1
Nomura (2005)		c	a	c	a	a Age	b BMI	a	a	b 10%		Nomura (2005)	7	0	1	0	1	1	1	1	1	1
Ohira (2011)		c	a	c	a			a	a	a		Ohira (2011)	5	0	1	0	1	0	0	1	1	1
Riese (2004)		c	a	c	a	a posture	b activity	a	a	b 0,6 %	Only 1 nurse	Riese (2004)	7	0	1	0	1	1	1	1	1	1
Teisala (2014)		d	a	c	a	a alcohol	b medication	a	a	d	FitFatTwin + Body and Future Health Study	Teisala (2014)	6	0	1	0	1	1	1	1	1	0
Uusitalo (2011)		c	a	c	a	a Age	b medication	a	a	b (2 people lost in the final analysis)	Heart Rate and Work stress project	Uusitalo (2011)	7	0	1	0	1	1	1	1	1	1
Vrijkotte (2000)		c	a	c	a	a. Age	b activity	a	a	b (average of 14% data loss)		Vrijkotte (2000)	7	0	1	0	1	1	1	1	1	1
Eriksson (2016)		b	a	c	a	a. Age	b Gender	a	a	c 32%	Intergene/Adonix	Eriksson (2016)	7	1	1	0	1	1	1	1	1	0
Jarczok (2016)		c	a	c	a	a Age	b Gender	a	a	b <1%	Mannheim Industrial Cohort Sample MCIS	Jarczok (2016)	7	0	1	0	1	1	1	1	1	1
Johnston (2016)		c	a	c	a	a. Activity	b Work tasks	a	a	b <2%	196 shifts/200	Johnston (2016)	7	0	1	0	1	1	1	1	1	1
Salavecz (2010)		d	d	c	b			d	b	d		Salavecz (2010)	1	0	0	0	0	0	0	0	1	0
Herr (2015)		c	a	c	a	a Age	b gender, sleep etc.	a	a	b 15%	Airplane manufacturer (later sample (2007) than Loerbroks)	Herr (2015)	7	0	1	0	1	1	1	1	1	1
Hanson (2001)		c	a	c	a	a. medication	b. movement	a	a	b 9%	4 subjects lost due to hypertension medication and 3 due to euipment failure	Hanson (2001)	7	0	1	0	1	1	1	1	1	1
Poorabdian (2013)		c	a	d	a	a. physical activity	b. caffeine	d	a	d		Poorabdian (2013)	5	0	1	0	1	1	1	0	1	0
Rau (2001)		a	b	a	a	a Age	b BMI	d	a	c 46%	In the analysis only n=81 respondents are used	Rau (2001)	6	1	0	1	1	1	1	0	1	0
vanAmelsfoort (2000)		a	b	a	a	a. Age	b Activity	d	a	b	20 of 155 were excluded	vanAmelsfoort (2000)	7	1	0	1	1	1	1	0	1	1
Doornen (2009)		a	b	a	a	a. Smoking	b BMI	d	a	b	Only supine periods were analyzed.	Doornen (2009)	7	1	0	1	1	1	1	0	1	1
Case control
Lennartsson (2016)		a	b	a	a	a. Age	b BMI	d	a	a		Lennartsson (2016)	7	1	0	1	1	1	1	0	1	1
